# Supplementary material
Source: publisher figshare collection journal article supplement (https://acs.figshare.com/ndownloader/files/4062244)
Supplement: Supplementary file 1 [file 4062244]

# **Mycoleptodiscin A and B, cytotoxic alkaloids from the endophytic fungus *Mycoleptodiscus* sp. F0194**

Humberto E. Ortega,<sup>†</sup> Paul R. Graupner,<sup>‡</sup> Yumi Asai,<sup>§</sup> Karen TenDyke,<sup>⊥</sup> Dayong Qiu,<sup>⊥</sup> Young Yongchun Shen,<sup>⊥</sup> Nivia Rios,<sup>||</sup> A. Elizabeth Arnold,<sup>±</sup> Phyllis D. Coley,<sup>Δ,#</sup> Thomas A. Kursar,<sup>Δ,#</sup> William H. Gerwick,<sup>≈</sup> Luis Cubilla Rios<sup>\*,†,#</sup>

<sup>†</sup>*Laboratory of Tropical Bioorganic Chemistry, Faculty of Natural, Exact Science and Technology, University of Panama, Panama*

<sup>‡</sup>*Natural Products Discovery, Dow AgroSciences, 9330 Zionsville Road, Indianapolis, Indiana 46268*

<sup>§</sup>*Eisai Co., Ltd., Tsukuba, Ibaraki 300-2635, Japan*

<sup>⊥</sup>*Eisai Inc., 4 Corporate Drive, Andover, MA 01810, USA*

<sup>||</sup>*Department of Microbiology, University of Panama; Panama*

<sup>±</sup>*School of Plant Sciences, The University of Arizona, Tucson, USA*

<sup>Δ</sup>*Department of Biology, University of Utah, USA*

<sup>#</sup>*Smithsonian Tropical Research Institute, Panama City, Panama*

<sup>≈</sup>*Scripps Institution of Oceanography, University of California at San Diego, La Jolla, CA 92093, USA.*

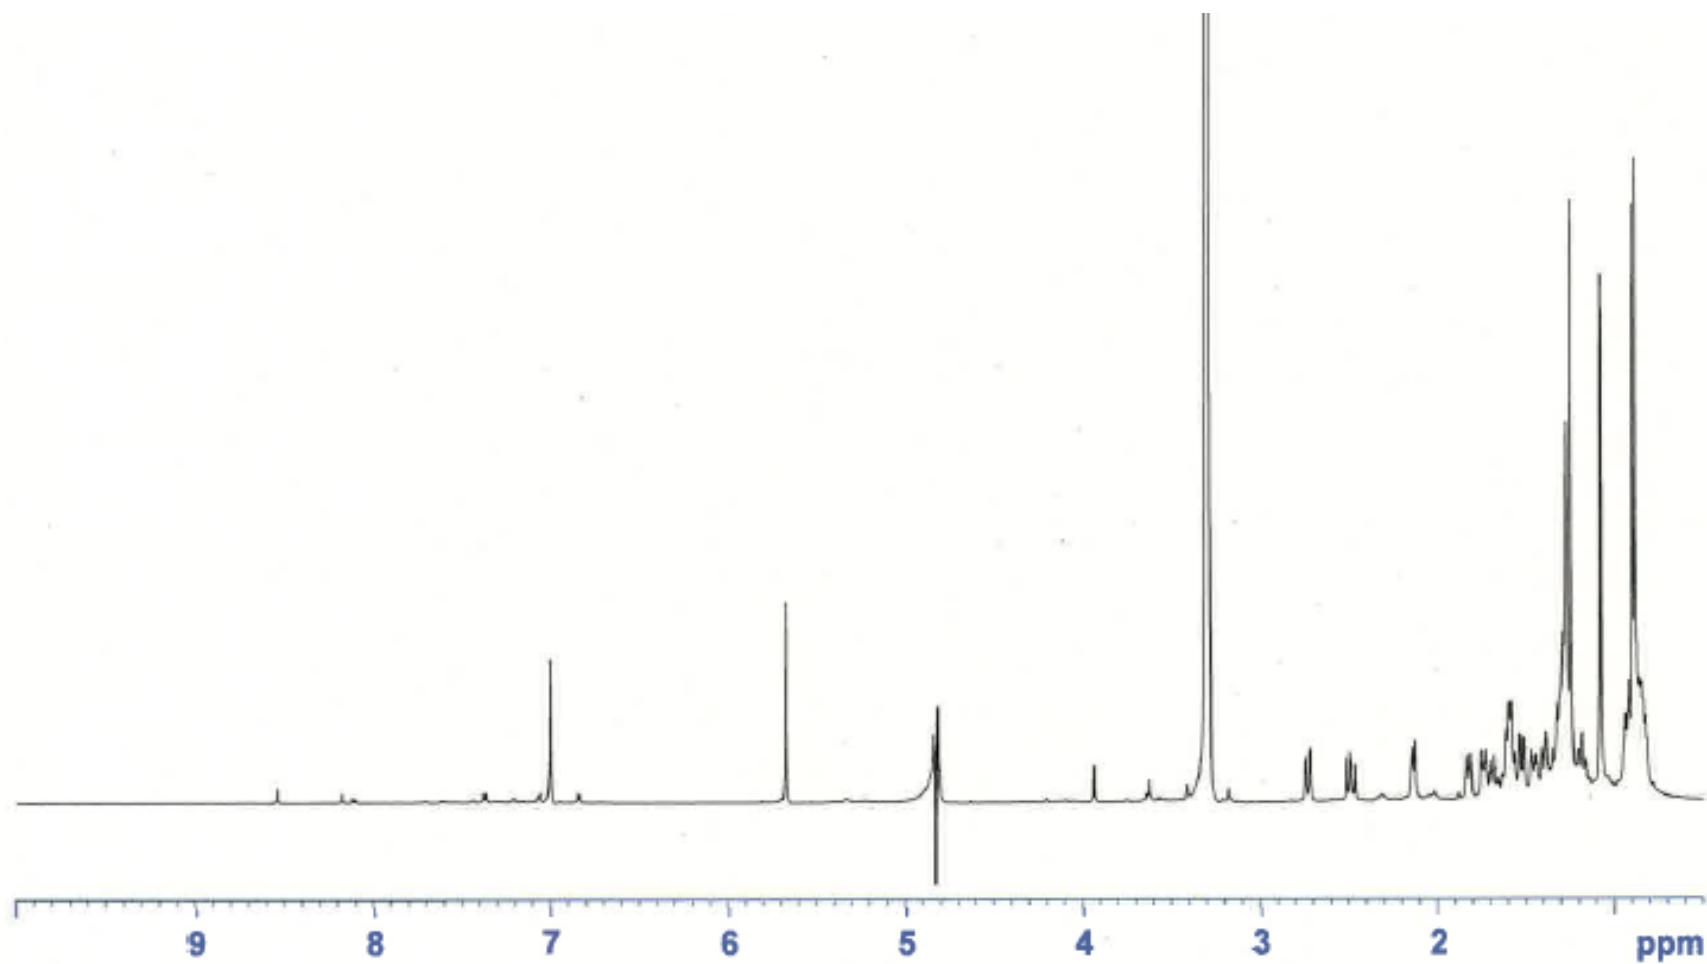

S1.  $^1\text{H}$  NMR (600 MHz,  $\text{CD}_3\text{OD}$ ) spectrum of the novel compound **1**

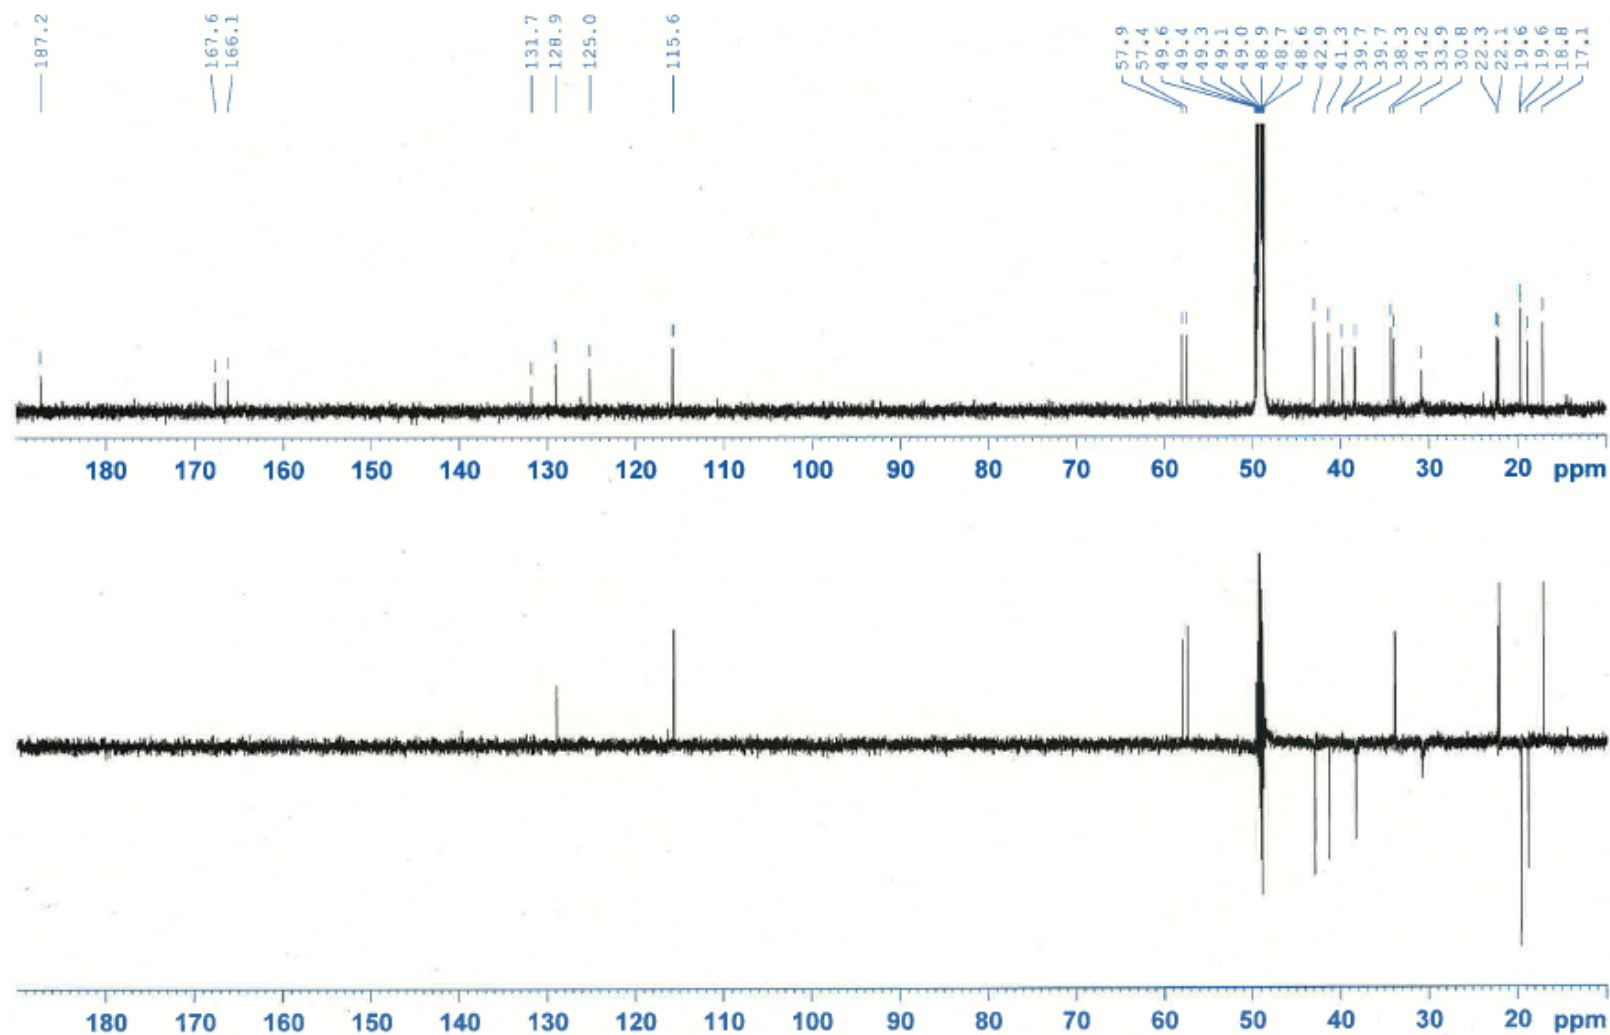

S2.  $^{13}\text{C}$  NMR and DEPT135 (600 MHz,  $\text{CD}_3\text{OD}$ ) spectrum of the novel compound **1**

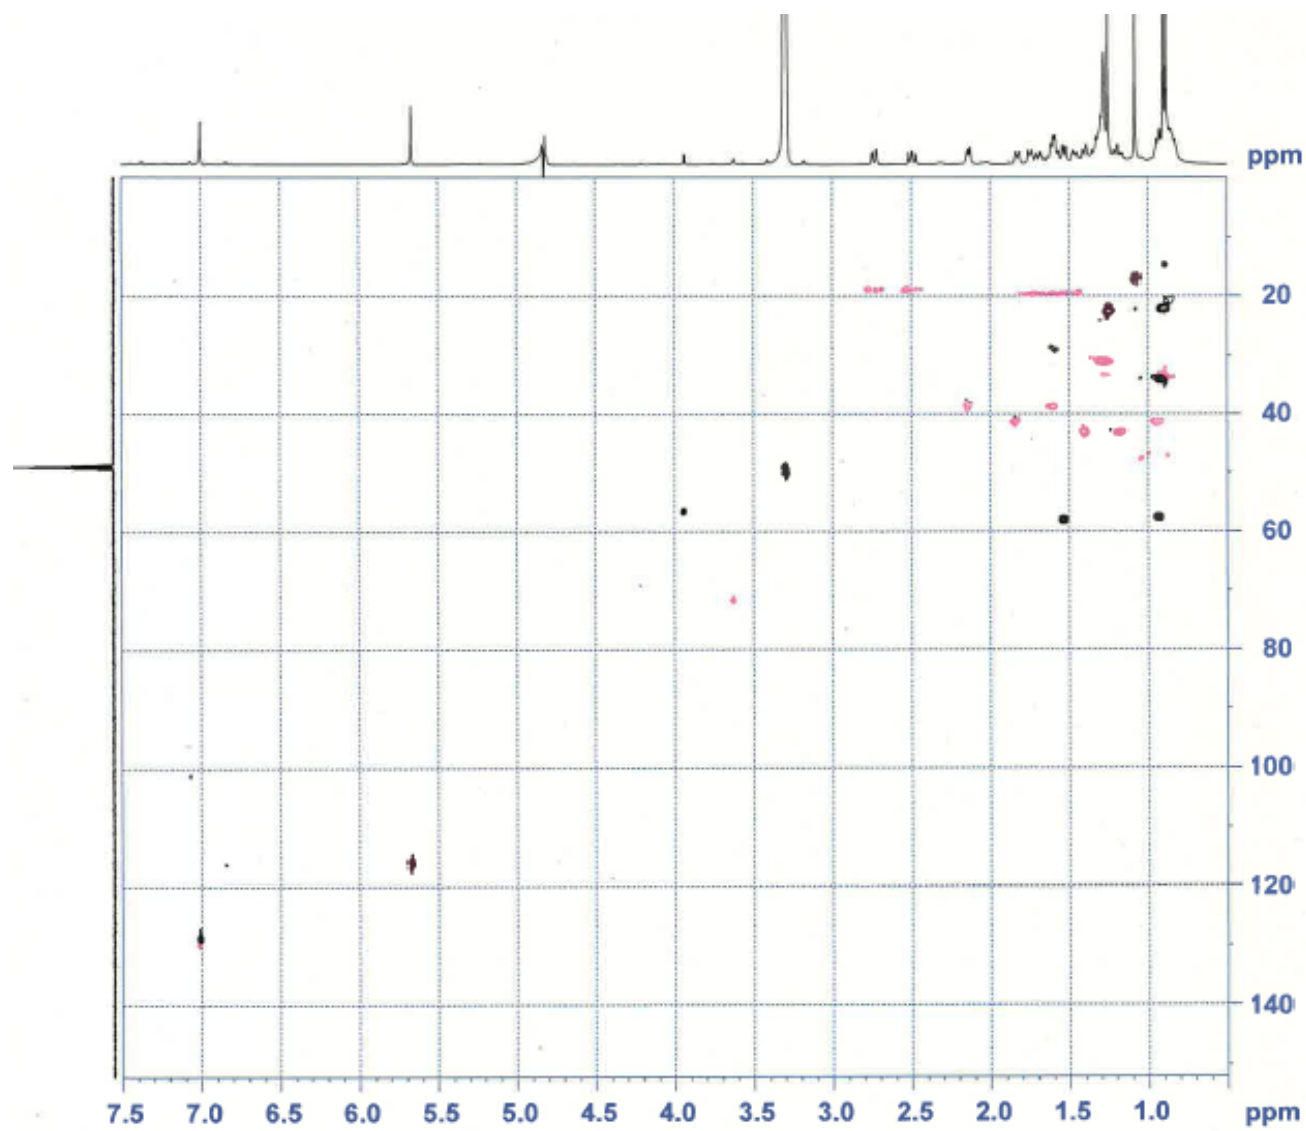

S3. HSQC (600 MHz, CD<sub>3</sub>OD) spectrum of the novel compound **1**

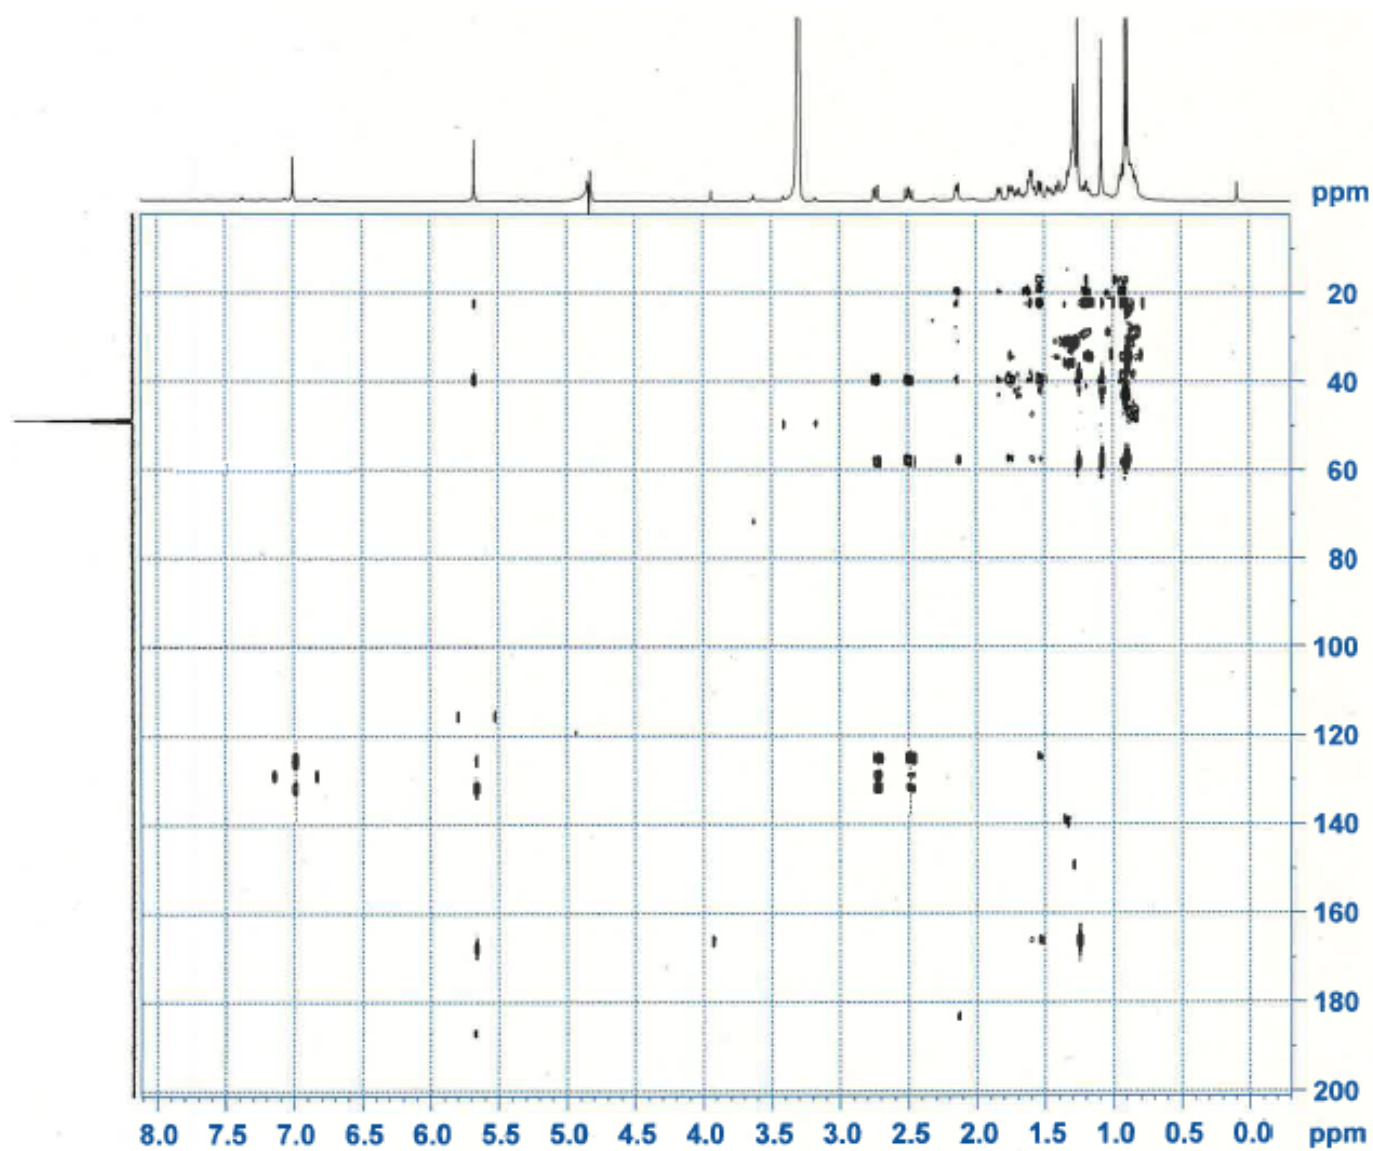

S4. HMBC (600 MHz,  $\text{CD}_3\text{OD}$ ) spectrum of the novel compound **1**

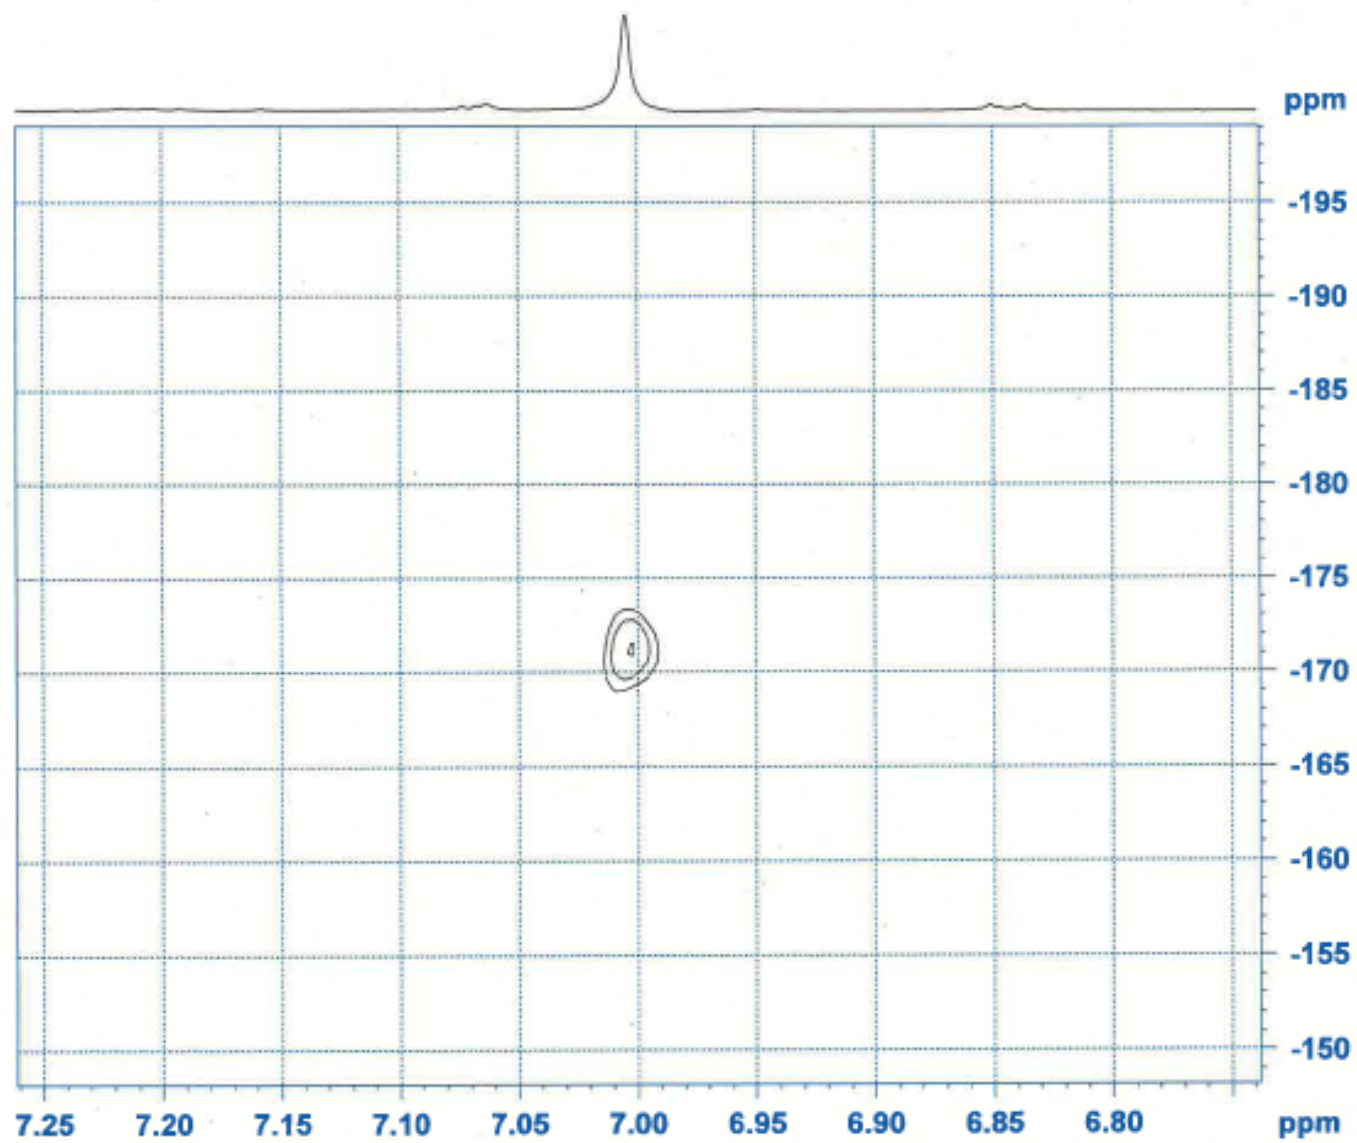

S5.  $^{15}\text{N}$  HMBC (600 MHz,  $\text{CD}_3\text{OD}$ ) spectrum of the novel compound **1**

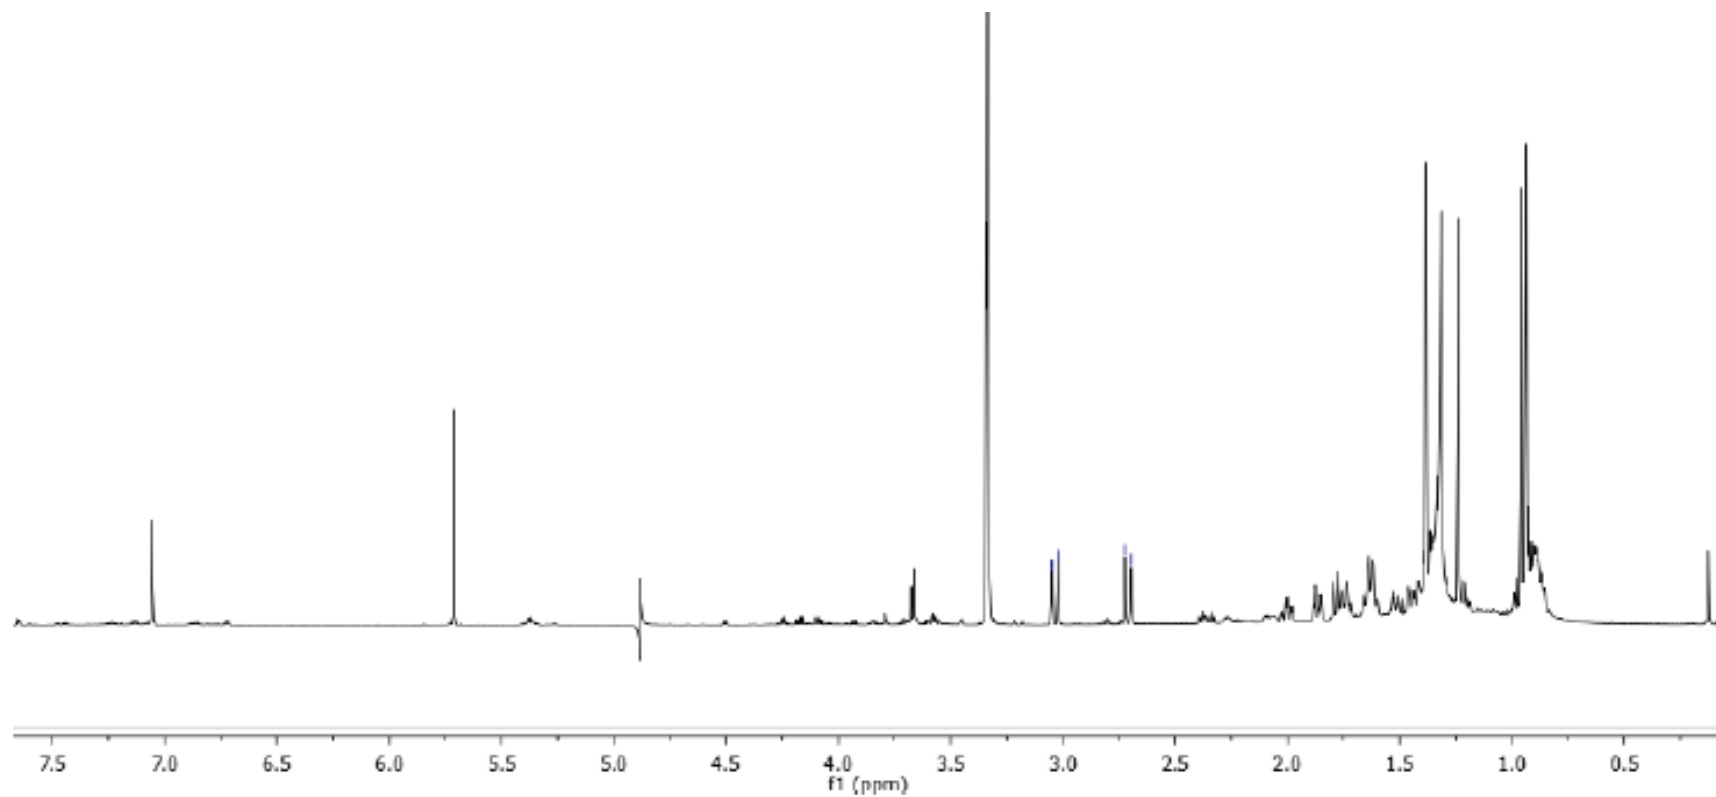

S6.  $^1\text{H}$  NMR (600 MHz,  $\text{CD}_3\text{OD}$ ) spectrum of the novel compound **2**

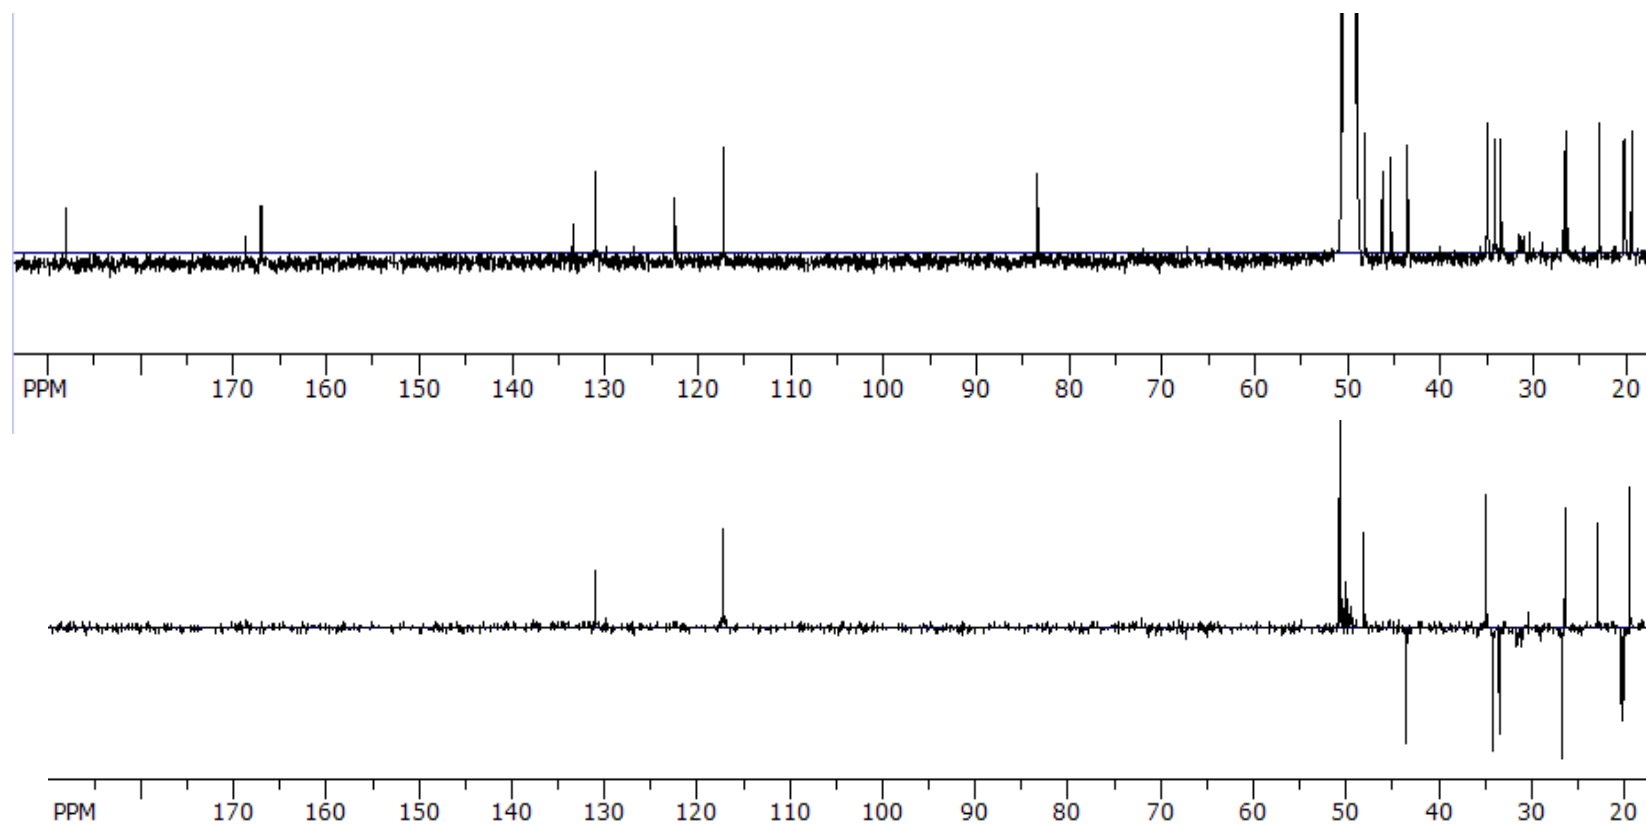

S7.  $^{13}\text{C}$  NMR and DEPT135 (600 MHz,  $\text{CD}_3\text{OD}$ ) spectrum of the novel compound **2**



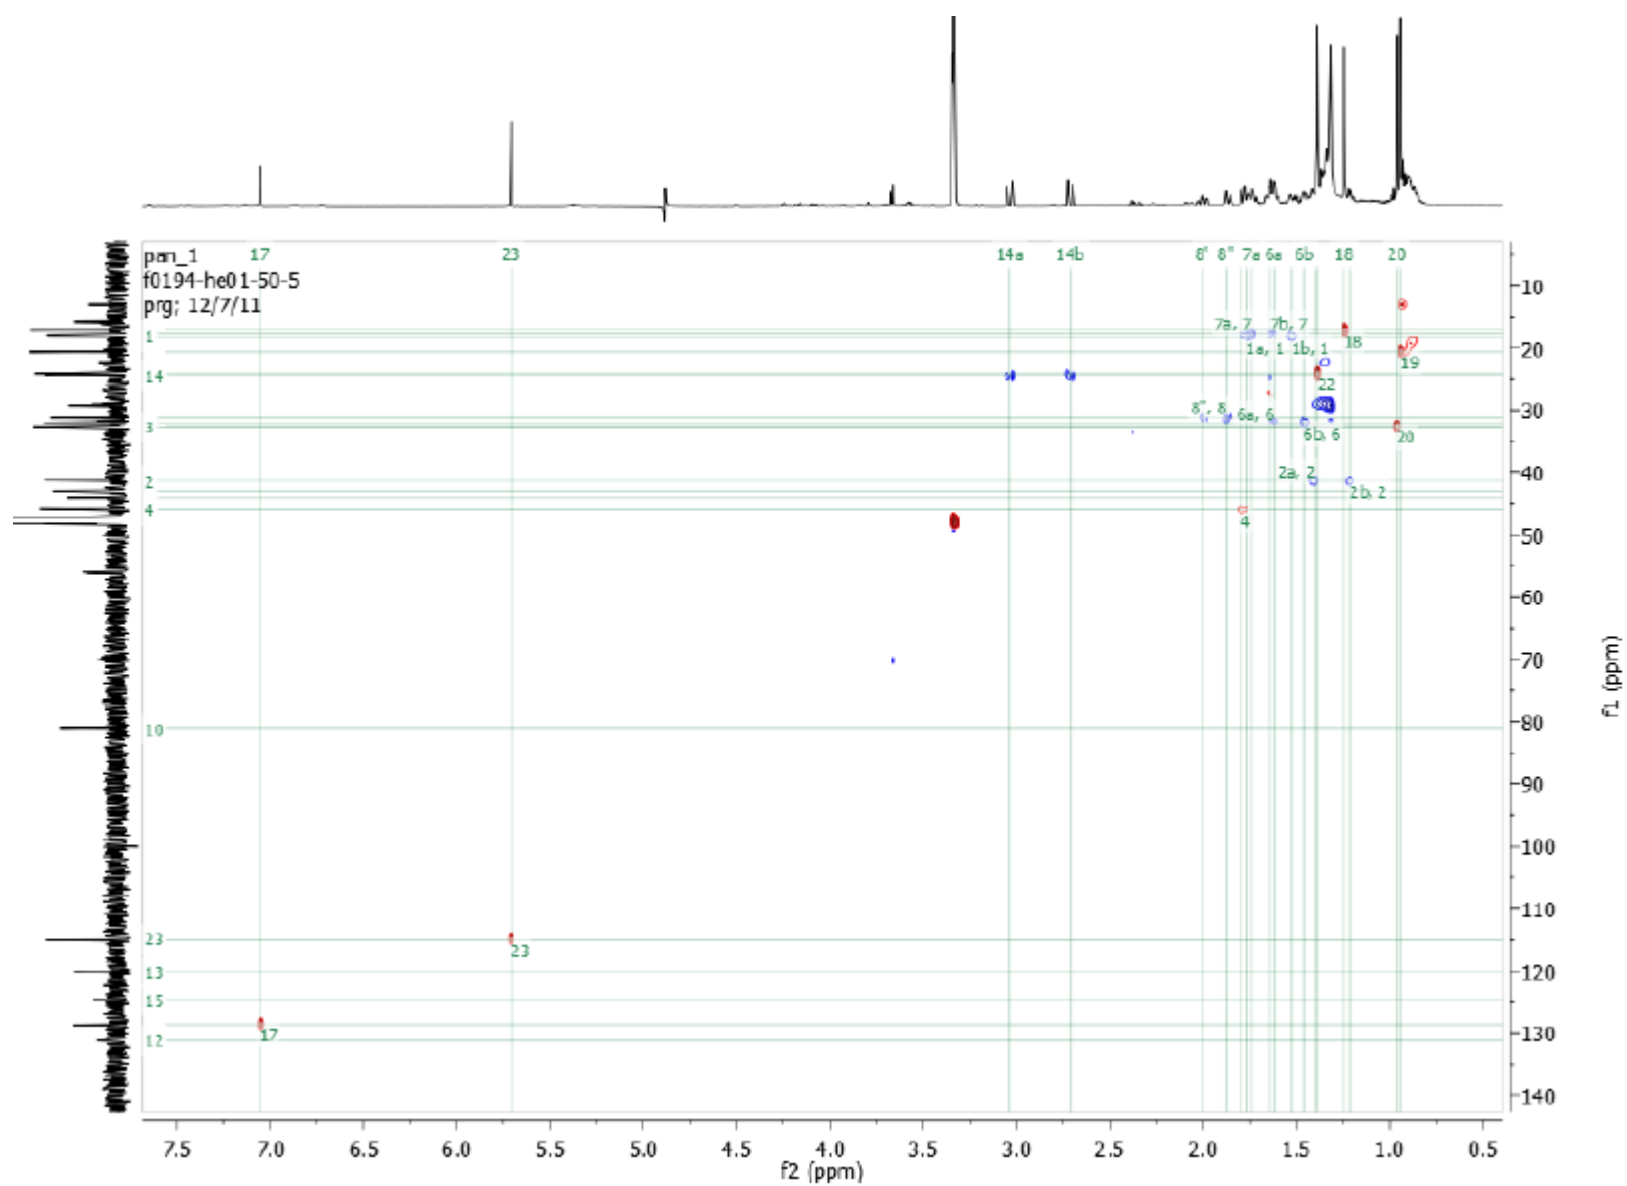

S8. HSQC (600 MHz, CD<sub>3</sub>OD) spectrum of the novel compound **2**

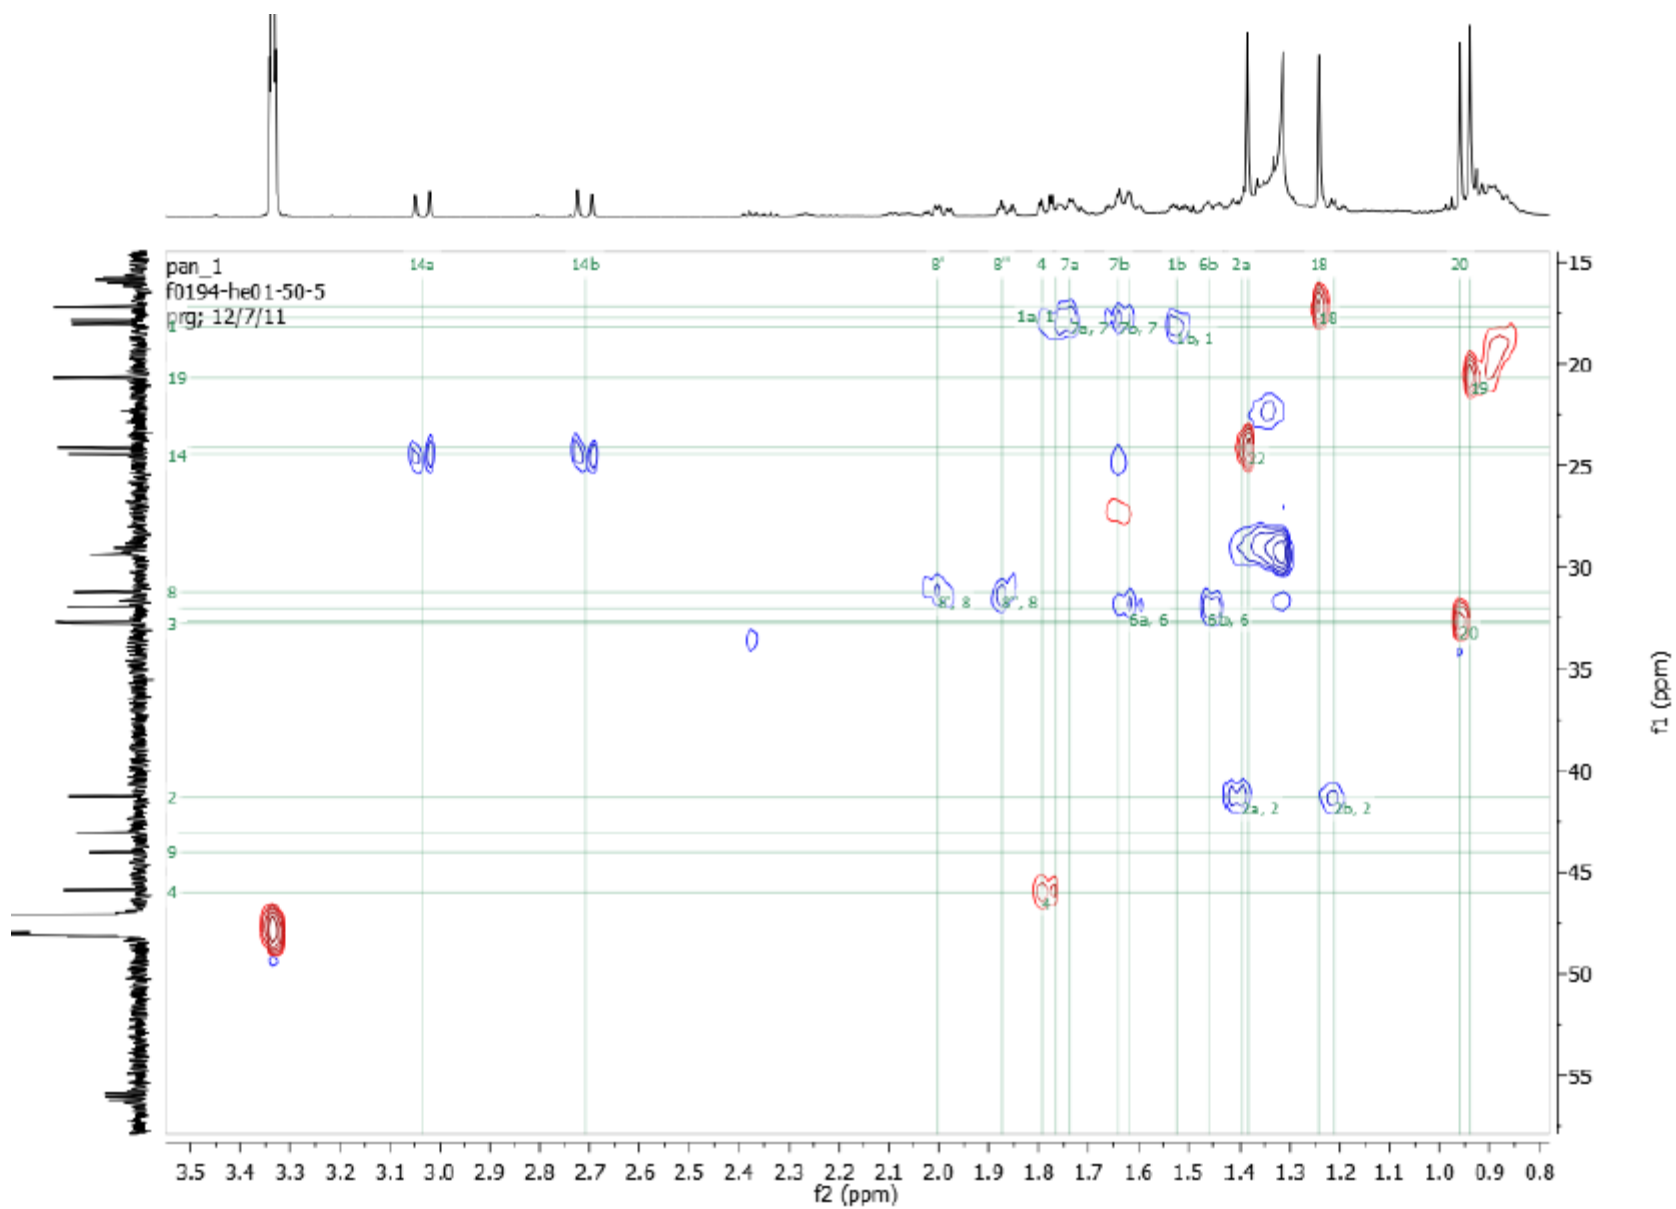

S9. HSQC expanded (600 MHz, CD<sub>3</sub>OD) spectrum of the novel compound **2**

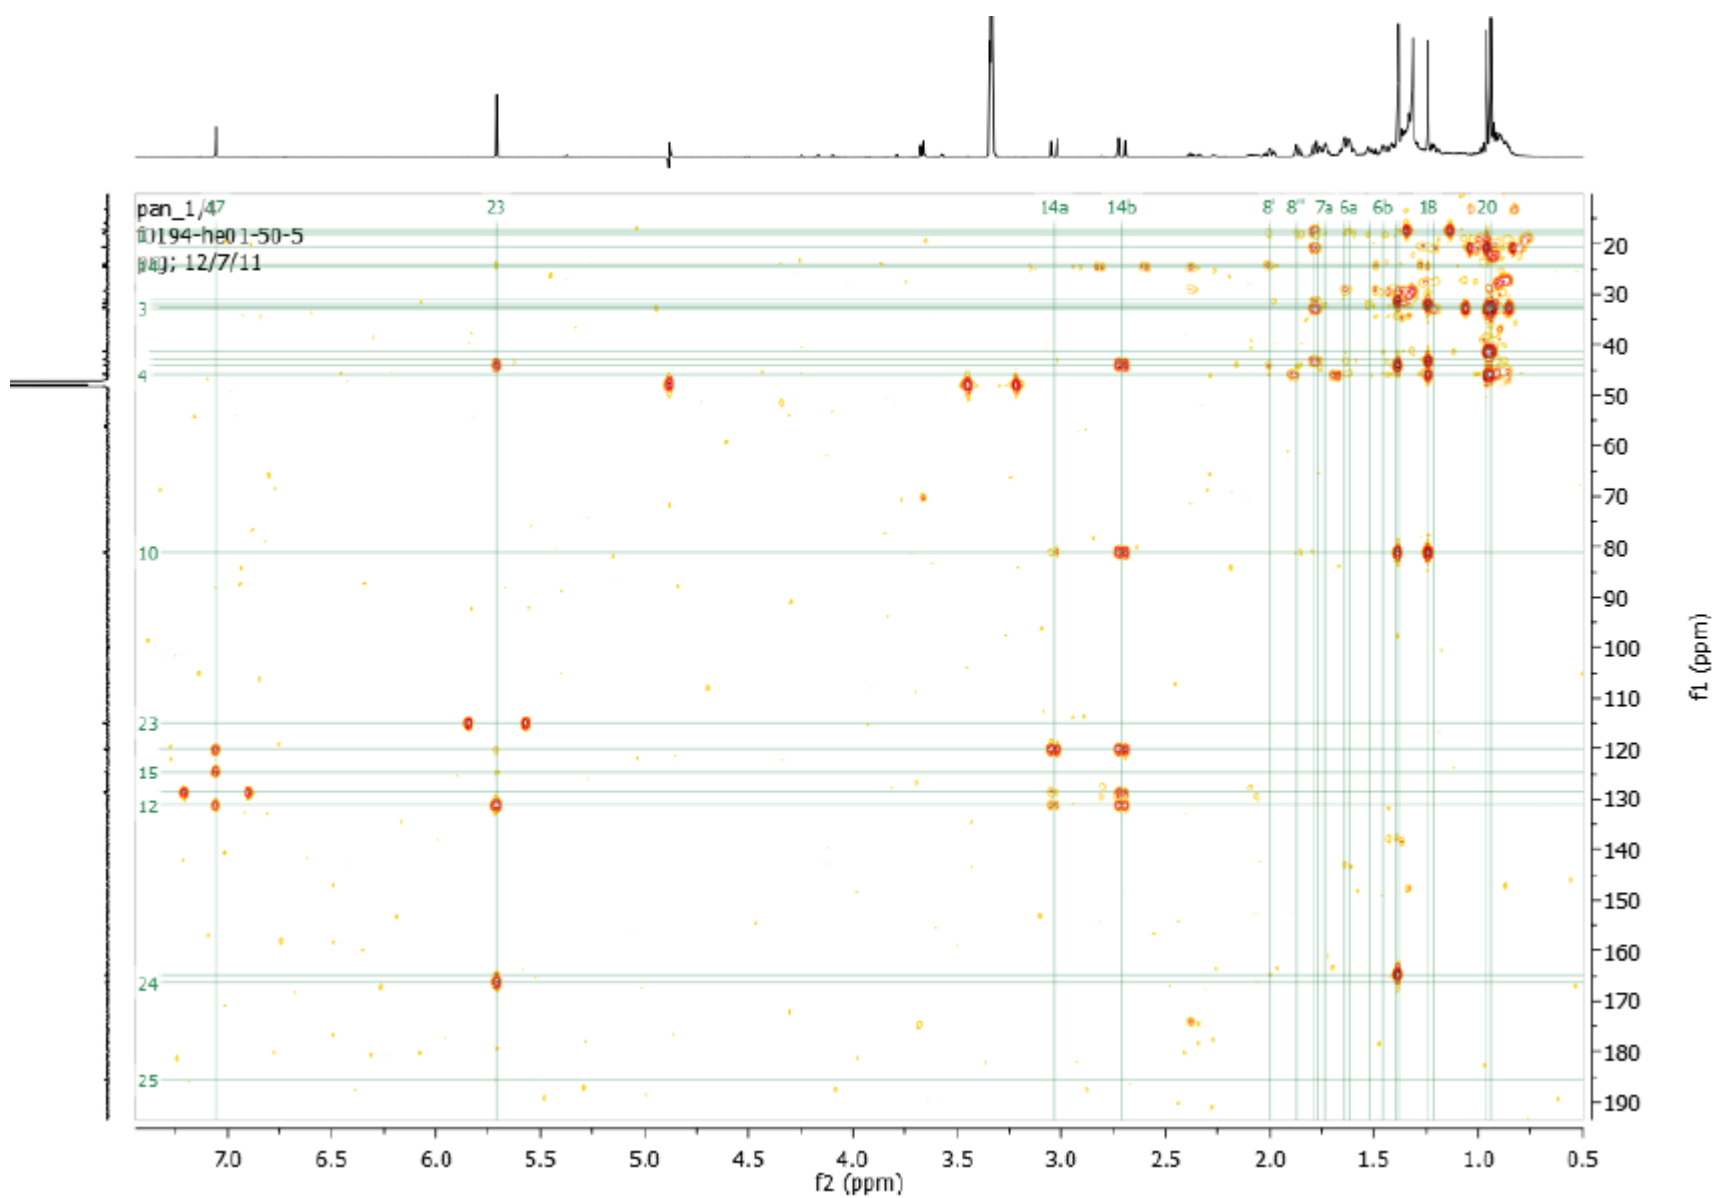

S10. HMBC (600 MHz, CD<sub>3</sub>OD) spectrum of the novel compound **2**

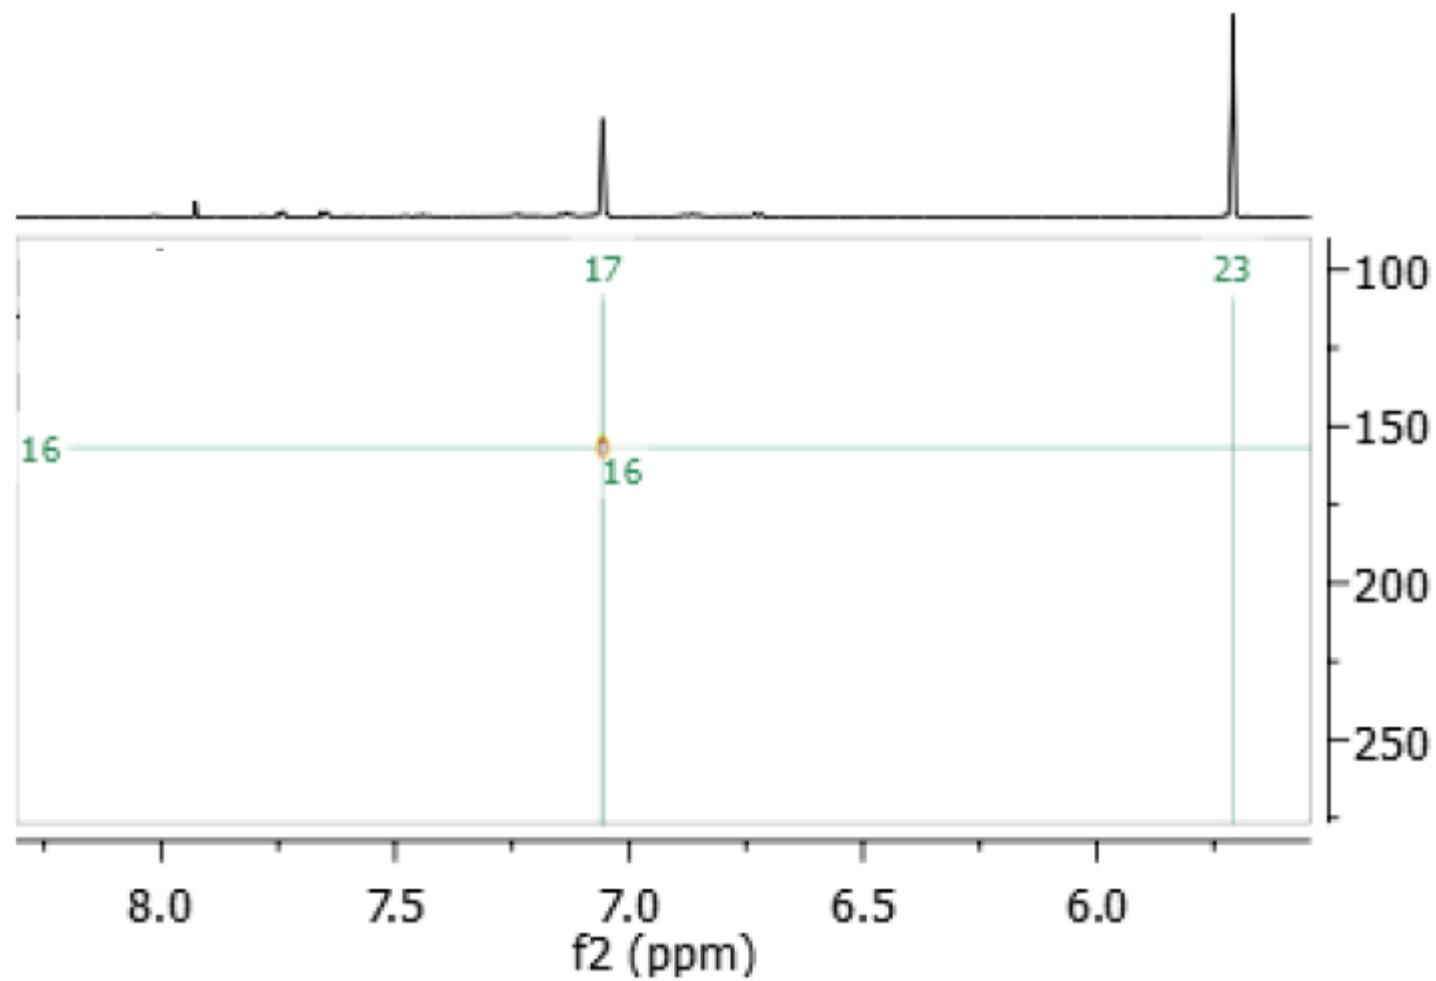

S11.  $^{15}\text{N}$  HMBC (600 MHz,  $\text{CD}_3\text{OD}$ ) spectrum of the novel compound **2**
